# Supplementary material
Source: PubMed Central journal article supplement (PMC7191262)
Supplement: NIHMS1581532-supplement-SUPPLEMENTARY.pdf [file NIHMS1581532-supplement-SUPPLEMENTARY.pdf]

## Supporting Information for

### **Tumor-Targeted, Cytoplasmic Delivery of Large, Polar Molecules using a pH-Low Insertion Peptide**

***Alexander A. Svoronos<sup>1,2</sup>, Raman Bahal<sup>3,4</sup>, Mohan C. Pereira<sup>1,5</sup>, Francisco N. Barrera<sup>1,6</sup>, John C. Deacon<sup>1</sup>, Marcus W. Bosenberg<sup>7</sup>, Daniel DiMaio<sup>1,3,8</sup>, Peter M. Glazer<sup>3</sup>, Donald M. Engelman<sup>1\*</sup>***

<sup>1</sup>Department of Molecular Biophysics and Biochemistry, Yale University, New Haven, CT 06511, USA

<sup>2</sup>Department of Biomedical Engineering, Yale University, New Haven, CT 06511, USA

<sup>3</sup>Department of Therapeutic Radiology, Yale University, New Haven, CT 06511, USA

<sup>4</sup>Department of Pharmaceutical Sciences, University of Connecticut, Storrs, CT 06269, USA

<sup>5</sup>Department of Science & Mathematics, Cedarville University, Cedarville, OH 45314, USA

<sup>6</sup>Department of Biochemistry & Cellular and Molecular Biology, University of Tennessee, Knoxville, TN 37996, USA

<sup>7</sup>Department of Dermatology, Yale University, New Haven, CT 06511, USA

<sup>8</sup>Department of Genetics, Yale University, New Haven, CT 06511, USA

\*Corresponding Author: Mailing Address: 266 Whitney Ave., P.O. Box 208114, New Haven, CT 06520-

8114; Phone: 203-432-5600; Email: [donald.engelman@yale.edu](mailto:donald.engelman@yale.edu)

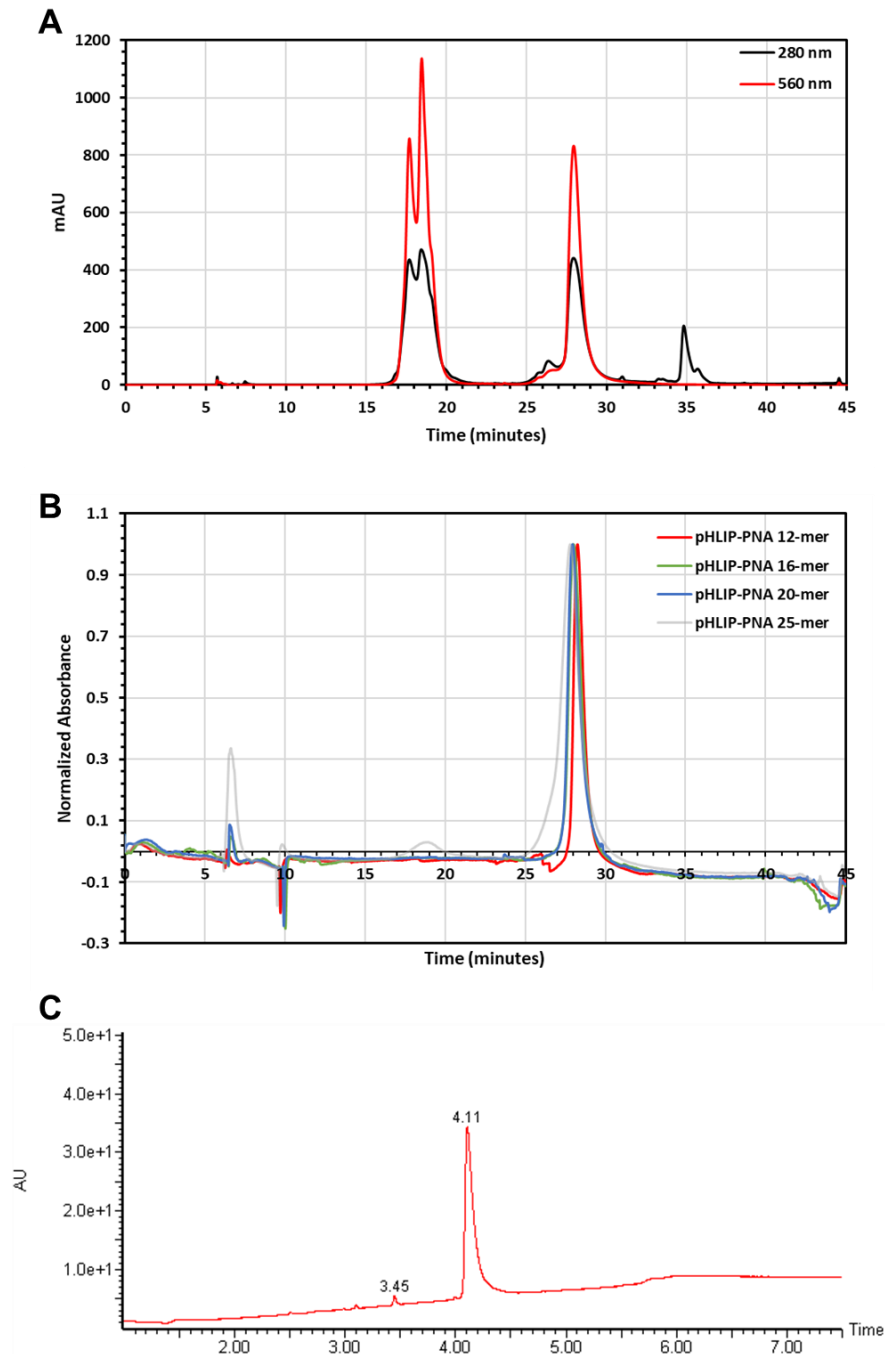

**Figure S1: Chromatograms of pHLIP Conjugates.** A) Representative HPLC chromatogram depicting the products of a typical pHLIP-PNA conjugation reaction. The split peaks at ~17.5 and ~18.5 minutes represent unreacted PNA and PNA dimer, respectively. The peak at ~28 minutes represents pHLIP-PNA. The peak at ~35 minutes represents unreacted pHLIP. B) HPLC chromatograms of purified pHLIP-PNAs. The peaks at ~6.5 minutes and negative peaks at ~10 minutes and ~44 minutes are artifacts. C) LC-MS chromatogram of purified pHLIP-TAMRA conjugate.

**Table S1: Mass Spectrometry Results:**

| <b>Construct</b>            | <b>Description</b>                                 | <b>Expected Mass</b>                                           | <b>Observed Mass</b> |
|-----------------------------|----------------------------------------------------|----------------------------------------------------------------|----------------------|
| pHLIP-PNA <sub>12-mer</sub> | pHLIP-Cys-Cys-ooo-PNA <sub>12-mer</sub> -ooo-TAMRA | [M+H <sup>+</sup> ]: 8313.67                                   | 8312.08              |
| pHLIP-PNA <sub>16-mer</sub> | pHLIP-Cys-Cys-ooo-PNA <sub>16-mer</sub> -ooo-TAMRA | [M+H <sup>+</sup> ]: 9363.08                                   | 9362.18              |
| pHLIP-PNA <sub>20-mer</sub> | pHLIP-Cys-Cys-ooo-PNA <sub>20-mer</sub> -ooo-TAMRA | [M+H <sup>+</sup> ]: 10486.51                                  | 10491.92             |
| pHLIP-PNA <sub>25-mer</sub> | pHLIP-Cys-Cys-ooo-PNA <sub>25-mer</sub> -ooo-TAMRA | [M+Na <sup>+</sup> ]: 11899.04                                 | 11897.20             |
| pHLIP-TAMRA                 | pHLIP-Cys-TAMRA                                    | [M+2H <sup>+</sup> ]: 2346.13<br>[M+3H <sup>+</sup> ]: 1564.42 | 2346.11<br>1564.41   |

TAMRA = 5-Carboxytetramethylrhodamine

Cys = cysteine

ooo = -NH-(CH<sub>2</sub>CH<sub>2</sub>O)<sub>3</sub>CH<sub>2</sub>CO-

Cys-Cys denotes disulfide bond

Cys-TAMRA denotes thioether bond between cysteine thiol and maleimide on TAMRA

\* MALDI-TOF mass spectrometry was used for pHLIP-PNA constructs. Liquid chromatography-mass spectrometry was used for the pHLIP-TAMRA construct.

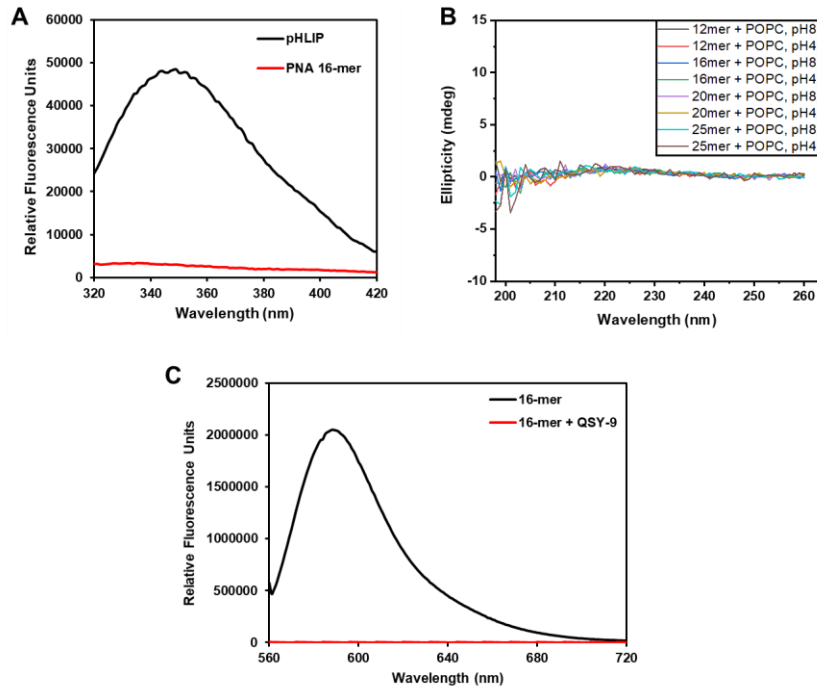

**Figure S2: Control Fluorescence Emission and CD Spectra.** A) Comparison of fluorescence within tryptophan emission range for 1  $\mu$ M pHILIP alone vs. 1  $\mu$ M PNA<sub>16-mer</sub> alone (no pHILIP) upon excitation at 280 nm. Notably, the PNA exhibits negligible fluorescence emission in this range compared to pHILIP. B) CD spectroscopy of PNAs alone when incubated with POPC vesicles at pH 8 or pH 4, respectively. Notably, no significant CD signal was observed. C) TAMRA fluorescence emission of 2  $\mu$ M pHILIP-PNA<sub>16-mer</sub> before and after the addition of 8  $\mu$ M QSY-9 quencher in the absence of POPC liposomes. Notably, the fluorescence signal was completely quenched.

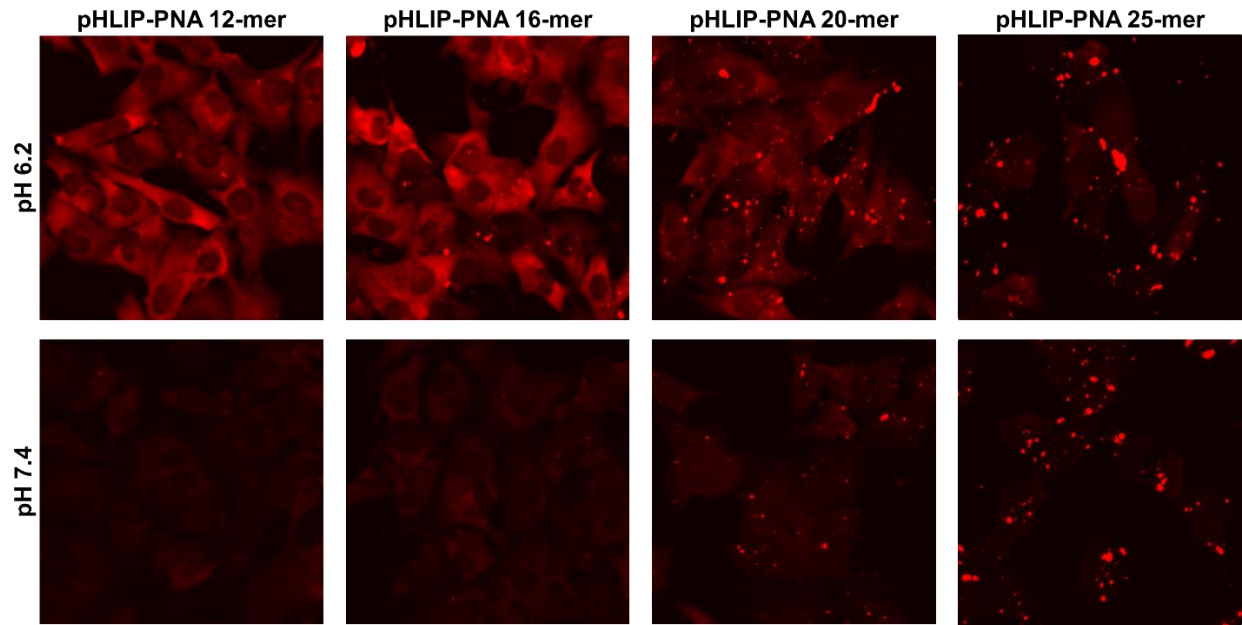

**Figure S3: pHLIP Delivery of PNA Cargoes to Cultured Cells.** A549 cells were incubated with 500 nM of each length pHLIP-PNA, respectively, at either pH 6.2 (top) or pH 7.4 (bottom) for 2 hours. Confocal microscopy images of the PNA TAMRA fluorescence signal are shown.
